## RESEARCH ARTICLE

Elemental composition and health risk assessment of PM<sub>10</sub>, PM<sub>2.5</sub>, at different microenvironments: Addis Ababa, EthiopiaAsamene Embiale Taye<sup>1\*</sup>, Bhagwan Singh Chandravanshi<sup>2</sup>, Feleke Zewge Beshah<sup>2</sup>, Endalkachew Sahle-Demessie<sup>3</sup>

**1** Department of Chemistry, College of Natural and Computational Sciences, Woldia University, Woldia, Ethiopia, **2** Department of Chemistry, College of Natural and Computational Sciences, Addis Ababa University, Addis Ababa, Ethiopia, **3** Department of Chemistry, Missouri University of Science and Technology, Rolla, Missouri, United States of America

\* [asamene@wldu.edu.et](mailto:asamene@wldu.edu.et)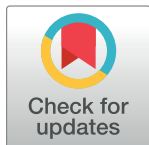

## Abstract

This study was designed to evaluate the health risks faced by inhabitants living in the slum areas of Addis Ababa, Ethiopia. The levels of PM<sub>2.5</sub> and PM<sub>10</sub> and elemental composition of the PM<sub>10</sub> were measured in indoors (in the kitchen and living room) and outdoors (at the roadside). A total of 75 sampling locations (45 indoor and 30 outdoor) were selected for the study. The levels of PM<sub>2.5</sub> and PM<sub>10</sub> were determined using an AROCET531S instrument, while an universal air pump was used for the sampling of PM<sub>10</sub> for the determination of trace elements by inductively coupled plasma-optical emission spectroscopy (ICP-OES). The health impacts of PMs on the inhabitants of twelve microenvironments (MEs), where they spend much of their daily time, were estimated. The total amounts of PM<sub>2.5</sub> and PM<sub>10</sub>, and trace metals in PM<sub>10</sub> found in the nine or twelve MEs ranged from 10.6–119, 128–185, and 0.007–0.197  $\mu\text{g m}^{-3}$ , respectively. According to the United States Environment Protection Agency (USEPA) guidelines, ten of the twelve MEs can cause significant health problems for inhabitants (HI > 1) due to PM<sub>2.5</sub> and PM<sub>10</sub>. Thus, special attention should be given by stakeholders/inhabitants to minimize the health impacts on long-term exposure. This study assessed the risk of levels of trace elements on the inhabitants who spend most of their daily lives. The study revealed that the lifetime cancer risk values for the individual and cumulative trace elements were within the tolerable range set by the USEPA guidelines.

## OPEN ACCESS

**Citation:** Taye AE, Chandravanshi BS, Beshah FZ, Sahle-Demessie E (2024) Elemental composition and health risk assessment of PM<sub>10</sub>, PM<sub>2.5</sub>, at different microenvironments: Addis Ababa, Ethiopia. PLoS ONE 19(10): e0309995. <https://doi.org/10.1371/journal.pone.0309995>

**Editor:** Worradorn Phairuang, Chiang Mai University, THAILAND

**Received:** July 3, 2024

**Accepted:** August 21, 2024

**Published:** October 25, 2024

**Copyright:** This is an open access article, free of all copyright, and may be freely reproduced, distributed, transmitted, modified, built upon, or otherwise used by anyone for any lawful purpose. The work is made available under the [Creative Commons CC0](https://creativecommons.org/licenses/by/4.0/) public domain dedication.

**Data Availability Statement:** All relevant data are within the manuscript and its [Supporting Information](#) files.

**Funding:** The author(s) received no specific funding for this work.

**Competing interests:** The authors declare that there are no conflicts of interest.

## Introduction

Air pollution is major concern in the world due to its impact on the longevity of humans and ecosystems [1]. Although the world's air quality has greatly improved, many regions, especially those in developing countries with dense populations, continue to experience poor air quality [2,3]. Indoor and outdoor air pollution in low- and middle-income countries accounts for 99% and 90%, respectively, of the total deaths worldwide [4]. Chronic and acute exposure to polluted air causes a variety of health complexities in humans, including premature death,

neurological disorders, gastrointestinal discomfort, hematological disorders, increased cardio-pulmonary morbidity and mortality, dermatitis, and cancer [1,2]. The World Health Organization (WHO) has recently released data showing that 17 people die from air pollution-related causes every minute. The data have also indicated that the life expectancy of populations exposed to high levels of PM<sub>2.5</sub> decreased the average global life expectancy at birth by approximately 1 year, with decreases of 1.2 to 1.9 years in polluted Asian and African countries [5,6]. Inhabitants of urban areas are much more affected than the rural areas by air pollution due to the expansion of industries, increasing use of biomass as domestic energy, high population density, absence of a good road network, and prevalence of old and poorly maintained vehicles [7–10].

Air pollution in sub-Saharan African (SSA) countries is relatively high due to the use of large amounts of biomass as a fuel source for cooking, limited access to affordable clean fuels, the use of low-efficiency stoves, and the enormous number of old vehicles. The SSA uses approximately 500,000 tons of firewood daily for its daily energy needs [3]. Compared to higher-income homes with effective ventilation systems and a greater likelihood of utilizing high-efficiency stoves, low-income housing is more affected by indoor air pollution [11]. According to a WHO report, the use of inefficient stoves causes the death of 600,000 Africans per year [8,12].

There are variations in the chemical composition of air pollution even within a single nation. This heterogeneity may be caused by varying sociodemographic traits, cultural customs and perceptions, source types and locations, and meteorological circumstances [2,13]. Hence, exposure assessment based on age, sex, activity level, and socioeconomic status is a promising method for remedial action at the individual level. Furthermore, in daily practice, people in the modern world have a much more mobile lifestyle than in recent decades that can be a cause for variation in the contaminant levels of exposure to the inhabitants in multiple locations for different durations. The personal exposure assessment for such people considering a fixed site monitoring method may not be adequately characterized [3,13]. At the same time, the daily activity patterns of individuals have a substantial effect on the total daily intake of pollutants. Thus, spatiotemporal variations in the concentration of contaminants require dynamic cross-ponding measurements of contaminants. Consequently, personal exposure assessments in different microenvironments are a better solution for the determination of pollutants with spatiotemporal variability and for providing more detailed information on individual short-term exposure to indoor and outdoor air pollution [2,3,13]. Therefore, in this study, the individual daily activity patterns in different microenvironments where people spend most of their time are considered in the exposure assessment of the population.

Several studies related to PM<sub>2.5</sub> and PM<sub>10</sub> and trace metals bound in the particulate matter in developed and developing countries have been reported in the literature [14–20]. However, there are few studies on air pollution in Ethiopia, and that too without examining the synergistic effects of combined microenvironments on health impact [21–23]. Thus, the synergistic impact of combined MEs, as well as the information on the impacts of respirable air pollutants including PM<sub>2.5</sub>, PM<sub>10</sub> and heavy metals bound in PM<sub>10</sub> on inhabitants living in metropolitan city such as Addis Ababa is mandatory. Hence, assessment of exposure to air pollutants using the microenvironmental (ME) modeling approach (average exposure is calculated using time spent and time-averaged concentrations at various places) still needs to be implemented [13]. Moreover, health risk assessments (estimates or predictions) for staying and operating in different combined MEs have yet to be reported in Ethiopia. Therefore, the objectives of this study are as follows: (1) to investigate the levels of PM<sub>2.5</sub> and PM<sub>10</sub> and concentrations of trace elements in PM<sub>10</sub>, in the kitchen (during cooking time), living room (feeding time), and road-side (commuting time), (2) to calculate the total dose intake of PM<sub>2.5</sub>, PM<sub>10</sub>, and trace

elements in PM<sub>10</sub> at different combined MEs, and (3) to estimate the potential health risk to inhabitants due to PM<sub>2.5</sub> and PM<sub>10</sub>, and trace elements in PM<sub>10</sub> at combined MEs. The results of this study can inform policy options and mitigation strategies to reduce exposure to harmful pollutants effectively and efficiently.

## Materials and methods

### Study region

Addis Ababa, Ethiopia's capital city, is 2,800 meters above sea level and is situated at 9°1'48"N and 38.74°E latitude and longitude. Addis Ababa city covers 500 km<sup>2</sup> with 3,000 km of road network, 45.5% of which is asphalt, and 54.5% is a gravel road [22]. The city is the center of many diplomatic and international organizations (the African Union and the World Economic Commission). Human activities, including daily traffic flow, numerous urban constructions, and industrial activities, impact the overall air quality of the city [24,25].

### Microenvironment information

The microenvironments under the study cover the living room (a place where inhabitants eat, study, watch television, discuss and play with their family members), kitchen (an area where inhabitants bake traditional staple food, *Injera*, using different traditional, improved, and clean stoves; cooking traditional sauce called 'Wot' using electricity, kerosene and charcoal of fuels) and roadside (a place where inhabitants are waking, waiting for a taxi and commuting to work during rush hours). These MEs were selected because inhabitants spend most of their daily lives in these places. The pollutant levels in kitchens and roadsides are also expected to be too high. Besides, although the pollutant level in the living room is expected to be low, inhabitants spend more time there than in the kitchen and roadside.

Furthermore, the type and location of the house selected for the study were mainly based on socioeconomic status, family size, altitude, population density, and the willingness of the owner to allow the researcher. Forty-five households from the three sub-cities (fifteen homes from each) were selected for kitchen and living room MEs. In contrast, thirty sampling locations near the city's major transportation corridors and roadside locations near the downtown roadside were selected for roadside MEs. A purposive sampling method was employed for selecting houses and sampling locations where the level of pollutants is expected to be high. The determination of levels of PM<sub>2.5</sub> and PM<sub>10</sub>, and the levels of trace elements in PM<sub>10</sub> were performed at each ME. Then, the integrated exposure assessment based on the total exposure concentration of the pollutants was calculated using Eq 1. Accordingly, the exposure time and amounts of pollutants are considered [26]. The time spent and level of pollutants could vary by location, affecting the total exposure level of people in these MEs. Consequently, the total levels of exposure are calculated as the product of the sum of time spent by a person in different MEs and the time-averaged air pollution concentrations occurring in those MEs divided by the total time spent in all MEs. The mathematical representation of the concept is given in Eq 1 [13,26]:

$$E_i = \frac{1}{T} \left( \sum_{j=1}^m C_{ij} t_{ij} \right) \quad (1)$$

where  $C_{ij}$  is the concentration of the pollutant measured in the  $j^{\text{th}}$  ME of the  $i^{\text{th}}$  individual;  $E_i$  is the exposure concentration of the  $i^{\text{th}}$  individual;  $T$  is the total time spent in all MEs;  $m$  is the number of different MEs; and  $t_{ij}$  is the time spent by the  $i^{\text{th}}$  individual in the  $j^{\text{th}}$  ME. Fig 1 displays the sampling region.

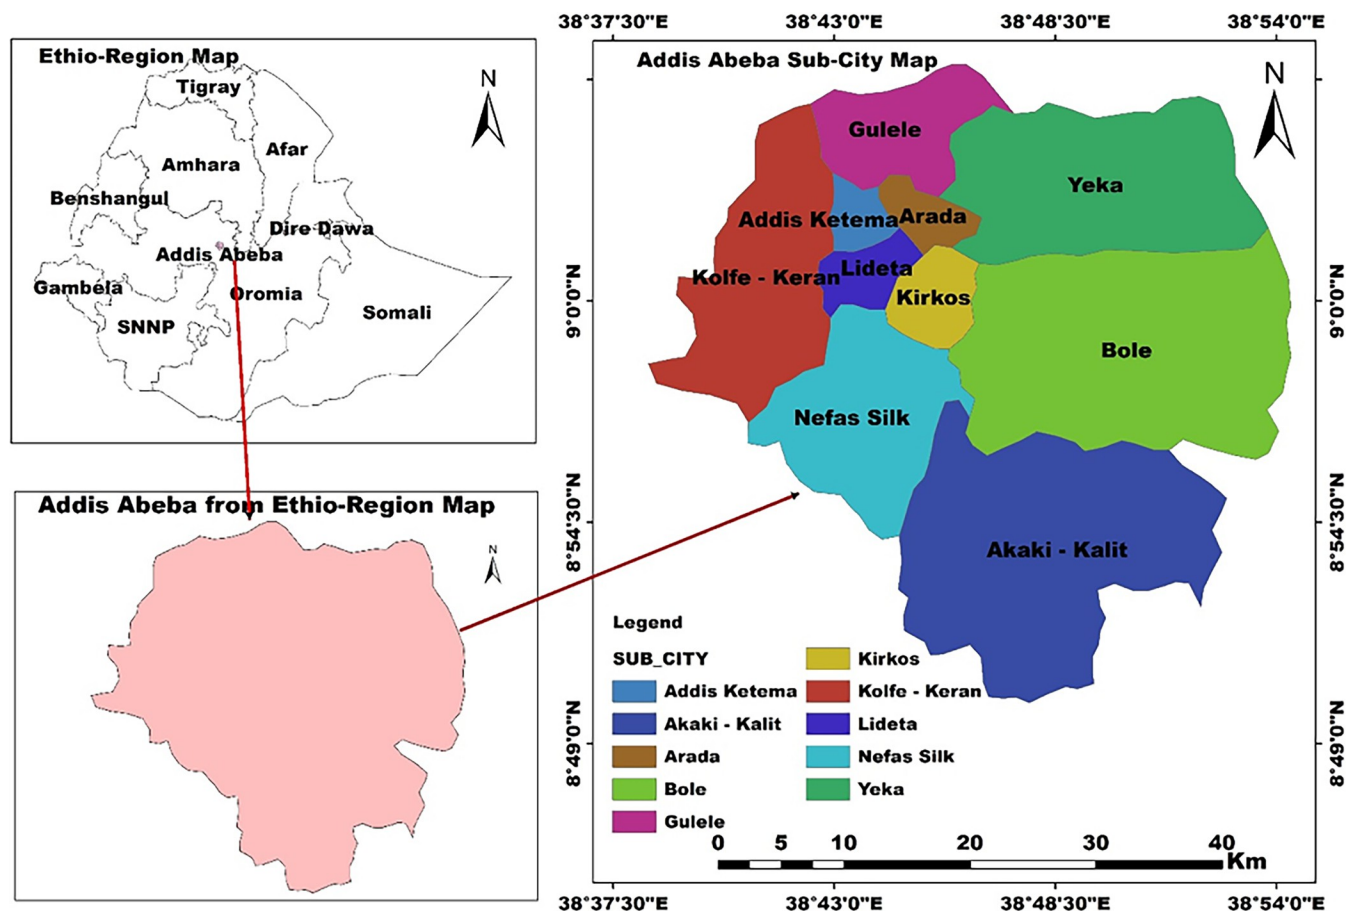

Fig 1. Map showing the sampling area of the ten sub-cities (source: The GADM database).

<https://doi.org/10.1371/journal.pone.0309995.g001>

### Statistical analysis

The Shapiro–Wilk test was used to assess the normality of the concentrations of PM<sub>2.5</sub> and PM<sub>10</sub>, and trace elements in PM<sub>10</sub>. The Kruskal–Wallis test and analysis of variance (ANOVA) were used to test for significant differences in the concentrations of pollutants across each ME. All the statistical tests were reported by considering a p value of 0.05. PM<sub>2.5</sub> and PM<sub>10</sub> were reported as the geometric mean (GOM) and geometric standard deviation (GSD), while the concentration of trace elements in PM<sub>10</sub> was reported as the arithmetic mean and standard deviation. All the statistical data analyses were performed using SPSS (Statistical Package for Social Sciences), Microsoft Excel 2016, and Microcal TM Origin version 8.

### Measurement of PM<sub>2.5</sub>, PM<sub>10</sub> and sampling of trace elements in PM<sub>10</sub>

The levels of PM<sub>2.5</sub> and PM<sub>10</sub> were determined using AROCET531S (Met One Instrument., OR 07526, USA) within 2 min intervals in each ME. Before entering the field, the instrument was calibrated based on the manufacturer's operating procedures. The equipment placement was different in each ME's depending on the inhabitants' breathing zone. It was 1.5 meters above the ground and 1 m away from the stove during baking of *Injera*, 1 m above the ground, and 1 m away from the stove/seat during cooking of the *Wot*. Similar arrangement was also made in the living room.

An universal air pump (SKC 224-PCTX4 Model, SKC Ltd, U.K.) integrated with a glass microfiber filter (Whatman®, GE Healthcare U.K. Limited, Amersham Place, U.K.) inside was used for sampling PM<sub>10</sub> for determination of trace elements by ICP–OES. The sampling device was positioned 1.5 meters above the ground for kitchen (when baking *Injera*) and road-side MEs, which is the average breathing zone for inhabitants. The kitchen (during cooking) and living room MEs were raised to a height of 1 m. The manufacturer's manual was used to calibrate the instrument's flow rate [27]. To eliminate the humidity and VOCs on the filters, the filter paper was dried in an oven at 150°C for two hours before sampling. The PM<sub>10</sub>-loaded filters were folded and raped with aluminum foil after the sampling process was complete before being brought back to the laboratory. Finally, to extract the elemental makeup of PM<sub>10</sub>, the wet digestion method developed by the US EPA [28] was used. The literature provides the specifics of the process [27].

### Method validation

The precision and accuracy of the method ensure the data quality. Thus, the instruments were calibrated, standard deviations were evaluated, and recovery tests were performed. A series of working standard solutions, 0, 0.5, 1, 2, 3, 4, and 5 µg mL<sup>-1</sup> for Ni, Pb, Fe, Cr, Co Cu, Mn, As, Cd, and Sn and 0, 1, 2, 3, 6, 8, and 10 µg mL<sup>-1</sup> for B, were prepared from a stock solution of 100 mg L<sup>-1</sup>. The linearity (r<sup>2</sup>) of the calibration curves ranged from 0.990 to 0.999, which are acceptable. The method detection limit was calculated using the standard deviation of seven replicate measurements multiplied by three (3 s), which ranged from 0.0001 to 0.003 µg m<sup>-3</sup>. The percent recovery, determined using the spiking method, was in the range of 92 to 110%, which are within the acceptable range. The details of the calibration curve equations and correlation coefficients for each are shown in [S1 Table](#).

### Inhabitants' health risk assessment of PM<sub>2.5</sub> and PM<sub>10</sub>

The health risk assessment of inhabitants due to PM<sub>2.5</sub> and PM<sub>10</sub> was performed by considering a method established by the U.S. EPA using the microenvironment (ME) modeling method [29]. Thus, MEs were classified based on type, frequency, and time spent for each activity. The most common activities performed by a particular adult are cooking *Wot* (two times per day), baking *Injera* (two times per week), seating in the living room (every day) and commuting to work or another purpose (every day). Consequently, twelve MEs were evaluated (nine possible MEs by considering all activities and three MEs by excluding baking *Injera* from all) to estimate the health risk of exposed inhabitants. The details of each ME and the parameters used in the risk assessment are given in [Table 1](#). The hazard quotient (HQ) and hazard index (HI) values were used for estimating inhabitants' cancer and noncancer risk. The average daily intake (ADD) in µg kg<sup>-1</sup> day<sup>-1</sup> of PM (PM<sub>2.5</sub> and PM<sub>10</sub>) used for calculating HQ was calculated via Eqs 2 and 3. The HQ and HI values were obtained using Eqs 4 and 9, respectively.

$$ADD = \frac{C \times IR \times ED}{AT \times BW} \quad (2)$$

$$ED = \frac{EF \times TA \times EL \times 1 \text{ day}}{24 \text{ h}} \quad (3)$$

$$HQ = \frac{ADD}{RfD} \quad (4)$$

**Table 1. The time required for all activity (TA), exposure frequency (EF), body weight (BW), exposure longevity (EL), average time (days), intake rate (IR) and exposure duration (ED).**

| Code of ME | Inhabitants' activity                                                                                                                                                     | TA (h day <sup>-1</sup> ) | EF (days year <sup>-1</sup> ) | EL (years) | ED (days) | AT (days) | IR (m <sup>3</sup> day <sup>-1</sup> ) | BW (kg) |
|------------|---------------------------------------------------------------------------------------------------------------------------------------------------------------------------|---------------------------|-------------------------------|------------|-----------|-----------|----------------------------------------|---------|
| 'A'        | Cooking <i>Wot</i> using electricity fuel, baking <i>Injera</i> using clean stove, seating in living room for family discussion, and commuting to work in roadside        | 10.1                      | 104                           | 50.0       | 2209      | 18250     | 20.0                                   | 60.7    |
| 'B'        | Cooking <i>Wot</i> using kerosene fuel, baking <i>Injera</i> using clean stove, seating in living room for family discussion, and commuting to work in roadside,          | 10.3                      | 104                           | 50.0       | 2253      | 18250     | 20.0                                   | 60.7    |
| 'C'        | Cooking <i>Wot</i> using charcoal fuel, baking <i>Injera</i> using clean stove, seating in living room for family discussion, and commuting to work in roadside           | 10.5                      | 104                           | 50.0       | 2297      | 18250     | 20.0                                   | 60.7    |
| 'D'        | Cooking <i>Wot</i> using electricity fuel, baking <i>Injera</i> using improved stove, seating in living room for family discussion, and commuting to work in roadside     | 10.0                      | 104                           | 50.0       | 2188      | 18250     | 20.0                                   | 60.7    |
| 'E'        | Cooking <i>Wot</i> using kerosene fuel, baking <i>Injera</i> using clean stove, seating in living room for family discussion, and commuting to work in roadside           | 10.3                      | 104                           | 50.0       | 2253      | 18250     | 20.0                                   | 60.7    |
| 'F'        | Cooking <i>Wot</i> using charcoal fuel, baking <i>Injera</i> using improved, seating in living room for family discussion, and commuting to work in roadside,             | 10.5                      | 104                           | 50.0       | 2297      | 18250     | 20.0                                   | 60.7    |
| 'G'        | Cooking <i>Wot</i> using electricity fuel, baking <i>Injera</i> using traditional stove, seating in living room for family discussion, and commuting to work in roadside, | 10.0                      | 104                           | 50.0       | 2188      | 18250     | 20.0                                   | 60.7    |
| 'H'        | Cooking <i>Wot</i> using kerosene fuel, baking <i>Injera</i> using traditional stove, seating in living room for family discussion, and commuting to work in roadside and | 10.3                      | 104                           | 50.0       | 2253      | 18250     | 20.0                                   | 60.7    |
| 'I'        | Cooking <i>Wot</i> using charcoal fuel, baking <i>Injera</i> using traditional stove, seating in living room for family discussion, and commuting to work in roadside.    | 10.5                      | 104                           | 50.0       | 2297      | 18250     | 20.0                                   | 60.7    |
| 'AA'       | Cooking <i>Wot</i> using electricity fuel, seating in living room for family discussion, and commuting to work in roadside                                                | 8.85                      | 365                           | 50.0       | 6730      | 18250     | 20.0                                   | 60.7    |
| 'BB'       | Cooking <i>Wot</i> using kerosene fuel, seating in living room for family discussion, and commuting to work in roadside                                                   | 9.28                      | 365                           | 50.0       | 7056      | 18250     | 20.0                                   | 60.7    |
| 'CC'       | Cooking <i>Wot</i> using charcoal fuel, seating in living room for family discussion, and commuting to work in roadside                                                   | 9.07                      | 365                           | 50.0       | 6904      | 18250     | 20.0                                   | 60.7    |

Note: TA and EF for each ME were calculated based on the time required for each activity.

<https://doi.org/10.1371/journal.pone.0309995.t001>

where ADD is the average daily intake ( $\mu\text{g kg}^{-1}\text{day}^{-1}$ ); ED is the exposure duration (days); IR is the intake rate ( $\text{m}^3 \text{day}^{-1}$ ); C is the concentration of pollutant in the air ( $\mu\text{g m}^{-3}$ ); EF is the time spent in polluted ME (days year<sup>-1</sup>); TA is the exposure time spent for all activities (hours day<sup>-1</sup>); AT represents the averaging time ( $\text{DE} \times 365 \text{ days year}^{-1}$ ); EL is the length of the exposure period (years); 1 day per 24 h is used as the conversion factor; BW is the body weight of inhabitants (60.7 kg, which is the average weight of an African adult); and RfD for PM<sub>2.5</sub> and PM<sub>10</sub> are  $10 \mu\text{g m}^{-3}$  and  $20 \mu\text{g m}^{-3}$ , respectively [12,28,30]. AT is the average time (67 years, which is Ethiopia's current average life expectancy) [31].

### Assessment of the health risk of inhabitants due to trace elements in PM<sub>10</sub>

PM<sub>10</sub> is a pollutant that significantly impacts human health, causing serious disease and premature death worldwide [32]. The air pollutants in general and the trace elements in PM<sub>10</sub> can enter the human body through three main exposure routes: inhalation, ingestion, and dermal absorption [33]. The levels of carcinogenic trace elements, including Cd, As, Pb, Cr, and Ni, and noncarcinogenic elements, including Cu, Fe, Zn, and Mn, bound to PM<sub>10</sub> were investigated in this study [34]. The U.S. EPA's integrated risk analysis framework, as expressed in Eqs 5–10, has been implemented to estimate the cancer and noncancer risk of inhabitants by elements in PM<sub>10</sub> via ingestion, inhalation, and dermal contact exposure routes [35].

$$D_{inh} = \frac{C \cdot InhR \cdot ED \cdot EF}{BW \cdot AT} \quad (5)$$



$$D_{ing} = \frac{C.IngR.ED.EF}{BW.AT} \times 10^6 \quad (6)$$

$$D_{der} = \frac{C.AF.SA.ABS.ED.EF}{BW.AT} \times 10^6 \quad (7)$$

$$HQ_{inh \text{ or } ing \text{ or } der} = \frac{D_{inh} \text{ or } D_{ing} \text{ or } D_{der}}{RfD} \quad (8)$$

$$HI = \sum HQ \quad (9)$$

$$LCR \text{ or } CR = D_{inh}.IUR = D_{ing}.SF = D_{der} \cdot \left( \frac{SF}{G} \right) \quad (10)$$

where C refers to the concentration of elements in the air ( $\mu\text{g m}^{-3}$  or  $\text{mg kg}^{-1}$ );  $D_{inh}$  refers to the daily dose by inhalation ( $\text{mg kg}^{-1} \text{ day}^{-1}$ );  $D_{ing}$  refers to the daily dose by ingestion ( $\text{mg kg}^{-1} \text{ day}^{-1}$ );  $D_{der}$  is the daily dose by dermal contact ( $\text{mg kg}^{-1} \text{ day}^{-1}$ ); AT refers to the averaging time (years); inR refers to the ingestion rate ( $\text{mg day}^{-1}$ , 100 for adult); InhR refers to the inhalation rate for adult ( $20 \text{ m}^3 \text{ day}^{-1}$ ); EF refers to the exposure frequency ( $\text{day} \cdot \text{year}^{-1}$ , given in Table 1 for each ME); ED refers to the exposure duration in years (18250 days, assumed starting at age of 17); BW refers to the body weight (kg, 60.5 which average body weight of adult African, LCR or CR refers to the lifetime cancer risk due to carcinogenic elements; IUR refers to the inhalation unit risk ( $(\mu\text{g m}^{-3})^{-1}$ ); AF refers to the skin adherence factor ( $\text{mg cm}^{-2} \text{ day}^{-1}$ , 0.07 for adult adult), AT is the averaging time (ED x life expectance (67 years, for non-cancer risk) and ED x 70, years for cancer risk); RfD is the reference dose of each intake path ( $\text{mg kg}^{-1} \text{ day}^{-1}$ , give in Table 2 for each element); SF refers to the slope factor ( $\text{mg kg}^{-1} \text{ d}^{-1}$ , given in Table 2); ABS refers to the dermal absorption factor (unitless, 0.001 for Cd, 0.030 for As and 0.010 for other elements), SA refers to the surface area ( $\text{cm}^2$ , 2011 for adult adult), and G refers to the gastrointestinal absorption factor, (unitless, give in Table 2). LCR or CR refers to the chance of an individual developing cancer [35]

## Results and discussion

### Average levels of PM<sub>2.5</sub> and PM<sub>10</sub> at individual microenvironments

The levels of PM<sub>2.5</sub> and PM<sub>10</sub> in different MEs while performing various activities during the study period are given in Fig 2. The microenvironments included LR (living room), EF

**Table 2.** The RfD at different exposure routes and the IUR, SF and G values for different elements [35–37].

| Parameter          | Fe    | Cu    | Mn      | B     | Zn    | Pb      | Cr     | Cd      | As       | Ni      |
|--------------------|-------|-------|---------|-------|-------|---------|--------|---------|----------|---------|
| RfD <sub>Inh</sub> |       | 0.040 | 0.00005 |       | 0.040 | 0.0035  | 0.0004 | 0.00001 | 0.000015 | 0.00005 |
| RfD <sub>Ing</sub> | 0.070 | 0.040 | 0.140   | 0.200 | 0.300 | 0.0035  | 0.0003 | 0.001   | 0.015    | 0.050   |
| RfD <sub>der</sub> |       | 1.00  | 1.00    |       | 1.00  | 1.00    | 0.025  | 0.025   | 1.00     | 0.040   |
| IUR                |       |       |         |       |       | 0.00008 | 0.012  | 0.0018  | 0.043    | 0.0024  |
| SF                 |       |       |         |       |       | 0.280   | 0.50   | 0.640   | 1.50     | 0.084   |
| G                  |       |       |         |       |       | 1.00    | 0.025  | 0.025   | 1.00     | 0.040   |

**Note:** RfD<sub>Inh</sub>, RfD<sub>Ing</sub> and RfD<sub>der</sub> are the reference doses for inhalation, ingestion and dermal contact exposure, respectively.

<https://doi.org/10.1371/journal.pone.0309995.t002>

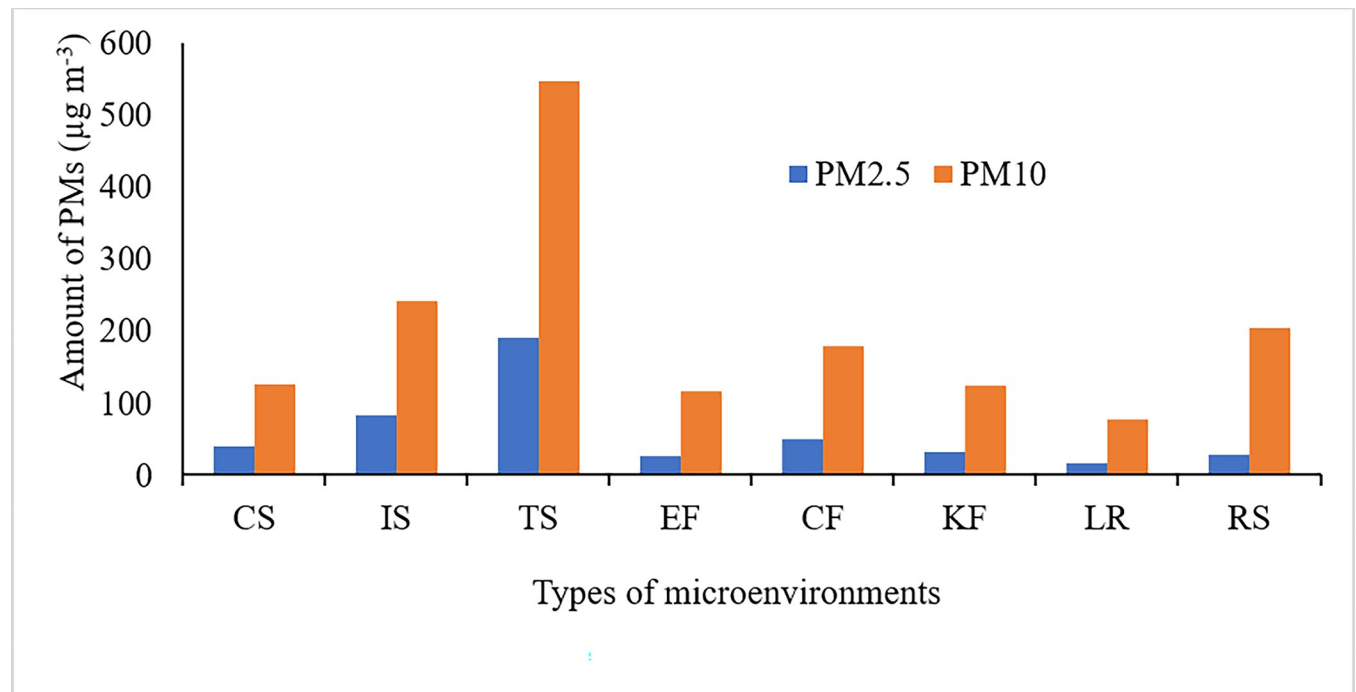

Fig 2. The level of PM<sub>2.5</sub> and PM<sub>10</sub> at different microenvironments (CS, IS, TS, EF, CF, KF, LR and RS).

<https://doi.org/10.1371/journal.pone.0309995.g002>

(kitchen during cooking *Wot* using electricity fuel), KF (kitchen during cooking *Wot* using kerosene fuel), CS (kitchen during cooking *Wot* using charcoal fuel), RS (roadside during commuting), CF (baking *Injera* using a clean stove), IS (baking *Injera* using an improved stove) and TS (baking *Injera* using a traditional stove). The geometric mean of PM<sub>2.5</sub> was found to range from 17.0 (LR) to 190 (TS) in the following order: LR < EF < RS < KF < CS < VF < IS < TS. The PM<sub>10</sub> concentration ranged from 77.6% (LR) to 547% (TS) in the following order: LR < EF < KF < CS < CF < RS < IS < TS. The highest amount was recorded at ME using the traditional stove for baking *Injera* due to the smoke coming from incomplete combustion of biomass [38]. Similar results were observed in previously studies that traditional stove has released more pollutants than improved and clean stove [39,40].

### The ADD and total exposure level at combined microenvironments

The ADD, total exposure level and health risk estimation of the inhabitants were carried out based on two scenarios. (1) When an adult spends her daily time baking *Injera*, cooking *Wot*, seating a living room and commuting (A, B, C, D, E, F, G, H and I MEs) and (2) when an adult spends her/his time in the same activity as in scenario 1, excluding baking *Injera* (AA, BB and CC MEs). The daily average time spent by an adult in each MEs was calculated, and the obtained results showed that an adult spent 10.1, 10.3, 10.5, 10.0, 10.3, 10.5, 10.0, 10.3, and 10.5 h in A, B, C, D, E, F, G, H and I MEs, respectively. The results confirmed that 42.0 to 44.0% of adults' daily life was lost in these MEs. The total exposure levels of PM<sub>2.5</sub> and PM<sub>10</sub> in the A, B, C, D, E, F, G, H and I MEs were calculated based on the inhabitants' exposure times, which ranged from 10.6 to 119 and 128 to 185 µg m<sup>-3</sup>, respectively. The highest value was observed in ME I, possibly due to the use of a large amount of biomass fuel for baking *Injera* and charcoal for cooking *Wot*. Similar result was reported in Kenya by [41], stating that traditional stoves have released large amounts of pollutant.



**Table 3. The average daily dose (ADD) and total exposure level ( $[\sum (C_{ij} \times t_{ij})]/T$ ) of PM<sub>2.5</sub> and PM<sub>10</sub> at different MEs.**

| Types of MEs          | ADD ( $\mu\text{g kg}^{-1} \text{ day}^{-1}$ ) |                  | Total exposure (mean $\pm$ SD) |                  |
|-----------------------|------------------------------------------------|------------------|--------------------------------|------------------|
|                       | PM <sub>2.5</sub>                              | PM <sub>10</sub> | PM <sub>2.5</sub>              | PM <sub>10</sub> |
| A                     | 0.423                                          | 5.10             | 10.6 $\pm$ 1.41                | 128 $\pm$ 32.7   |
| B                     | 0.453                                          | 5.20             | 11.1 $\pm$ 1.37                | 128 $\pm$ 31.7   |
| C                     | 0.632                                          | 5.60             | 15.3 $\pm$ 2.68                | 135 $\pm$ 31.7   |
| D                     | 0.955                                          | 5.60             | 24.2 $\pm$ 7.97                | 142 $\pm$ 29.8   |
| E                     | 0.991                                          | 5.73             | 24.4 $\pm$ 7.68                | 141 $\pm$ 31.1   |
| F                     | 1.17                                           | 6.13             | 28.2 $\pm$ 55.3                | 148 $\pm$ 29.8   |
| G                     | 4.70                                           | 6.99             | 119 $\pm$ 7.25                 | 177 $\pm$ 33.3   |
| H                     | 4.75                                           | 7.13             | 117 $\pm$ 53.9                 | 175 $\pm$ 31.9   |
| I                     | 4.93                                           | 7.53             | 119 $\pm$ 52.0                 | 185 $\pm$ 28.9   |
| AA                    | 0.86                                           | 15.6             | 7.08 $\pm$ 1.12                | 129 $\pm$ 42.6   |
| BB                    | 1.59                                           | 17.4             | 12.5 $\pm$ 3.68                | 136 $\pm$ 37.3   |
| CC                    | 1.42                                           | 19.4             | 17.6 $\pm$ 1.28                | 156 $\pm$ 40.8   |
| RfD <sub>annual</sub> | 3.24                                           | 6.56             | —                              | —                |

**Note:** RfD<sub>annual</sub> is the annual average daily dose.

<https://doi.org/10.1371/journal.pone.0309995.t003>

On the other hand, the total time spent by an adult in the AA, BB and CC MEs was 8.85, 9.28 and 9.08 h, respectively. Thus, the total time spent in the AA, BB and CC MEs accounts for 36.9%, 38.7% and 37.8%, respectively, of the adult's daily time. The ADDs of PM<sub>2.5</sub> and PM<sub>10</sub> ranged from 0.860 to 1.59 and 15.6 to 19.4  $\mu\text{g m}^{-3}$ , respectively. The exposure levels of PM<sub>2.5</sub> and PM<sub>10</sub> in the AA, BB and CC MEs ranged from 7.08 to 156, with the maximum and minimum values occurring in the CC and AA MEs, respectively, as presented in Table 3. The detailed values for the average daily doses and total exposure levels of PM<sub>2.5</sub> and PM<sub>10</sub> at different MEs are given in Table 3.

### Health risk assessment of PM<sub>2.5</sub> and PM<sub>10</sub> at combined microenvironments

As inhabitants spend a larger proportion of their daily time in the studied MEs, they have high probability of getting non-cancer risk. Table 4 provides a summary of the HQ and HI calculations for the noncarcinogenic hazards of PM<sub>2.5</sub> and PM<sub>10</sub> for an adult depending on the total exposure level at each ME. The HQ values is calculated by taking into account of each pollutant's separate effects. Thus, the HQs of PM<sub>2.5</sub> and PM<sub>10</sub> across the MEs (A, B, C, D, E, F, G, H, and I) ranged from 0.130 to 1.52 and from 0.777 to 1.15, respectively. The HQ values of PM<sub>2.5</sub> and PM<sub>10</sub> in the G', H', and I' MEs were higher than those in the other units, which indicates that inhabitants in these MEs had a significant noncancer risk. The I and A MEs had the maximum and lowest HQ values, respectively. The combined effects of PM<sub>2.5</sub> and PM<sub>10</sub> were evaluated using HI, which was found to range between 0.907 (A) and 2.67 (I) MEs. An adult who spends more time in any of these MEs may be at risk for non-cancer health problems caused

**Table 4. Hazard quotient (HQ) and hazard index (HI) results for PM<sub>2.5</sub> and PM<sub>10</sub> at different MEs.**

| ME                       | A     | B     | C     | D     | E     | F     | G    | H    | I     | AA    | BB    | CC    |
|--------------------------|-------|-------|-------|-------|-------|-------|------|------|-------|-------|-------|-------|
| HQ for PM <sub>2.5</sub> | 0.130 | 0.140 | 0.195 | 0.295 | 0.306 | 0.362 | 1.45 | 1.47 | 1.522 | 0.265 | 0.490 | 0.677 |
| HQ for PM <sub>10</sub>  | 0.777 | 0.793 | 0.853 | 0.853 | 0.873 | 0.935 | 1.07 | 1.09 | 1.15  | 2.38  | 2.65  | 2.96  |
| HI ( $\Sigma$ HQ)        | 0.907 | 0.933 | 1.05  | 1.15  | 1.18  | 1.30  | 2.52 | 2.56 | 2.67  | 2.65  | 3.14  | 3.64  |

<https://doi.org/10.1371/journal.pone.0309995.t004>

by PM<sub>2.5</sub> and PM<sub>10</sub>, according to the results, which showed that all MEs, with the exception of MEs A and B, have an HI value greater than unit.

Furthermore, the noncancer health risk of an adult who did not bake *Injera* was estimated by considering the AA, BB, and CC MEs. The HQs of PM<sub>2.5</sub> and PM<sub>10</sub> at the AA, BB, and CC MEs were 0.265–0.677 and 2.38–2.96, respectively. Thus, the HQs of PM<sub>10</sub> at the AA, BB, and CC MEs were higher than one, and hence inhabitants at these MEs might have a significant health problem. Similarly, the cumulative effects of the PM<sub>2.5</sub> and PM<sub>10</sub> concentrations on the AA, BB, and CC MEs ranged from 2.65–3.64, indicating that inhabitants in these MEs might have significant health effects. Therefore, minimize the staying in AA, BB and CC microenvironments is highly recommended to prevent the health impacts.

### The level of trace elements across each microenvironment

The corresponding levels of Fe, Cu, Mn, B, Zn, Pb, Cr, Cd, Sn, As, Ni and Co were 0.013 (EF)–0.254 (IS); BDL (CS, TS and IS)–0.057 (RS); 0.001 (CF)–0.444 (RS); 0.01 (LR)–0.632 (IS); 0.001 (LR)–0.351 (IS); 0.001 (LR)–0.109 (RS); 0.02 (EF)–0.013 (RS); 0.0007 (EF)–0.027 (RS); 0.001 (EF)–0.120 (RS); 0.002 (CF)–0.036 (RS); 0.003 (LR)–0.044 (RS); and 0.001 (EF)–0.04 (RS). The results revealed that the highest levels of most of the trace elements were found in the outdoor microenvironment at the roadside (RS), except for boron and zinc, which were highest in the kitchen microenvironment during baking of *Injera* using an improved stove. This might be due to high traffic congestion, which releases more trace metals through smoke [38]. Similarly, the highest level of B and Zn in improved stove might be due to their micronutrient nature for a plant growth, and that burning of such plant sources resulted for high amount of the metals in particulate matter [42,43]. The general patterns of the investigated elements in different microenvironments are depicted in Fig 3.

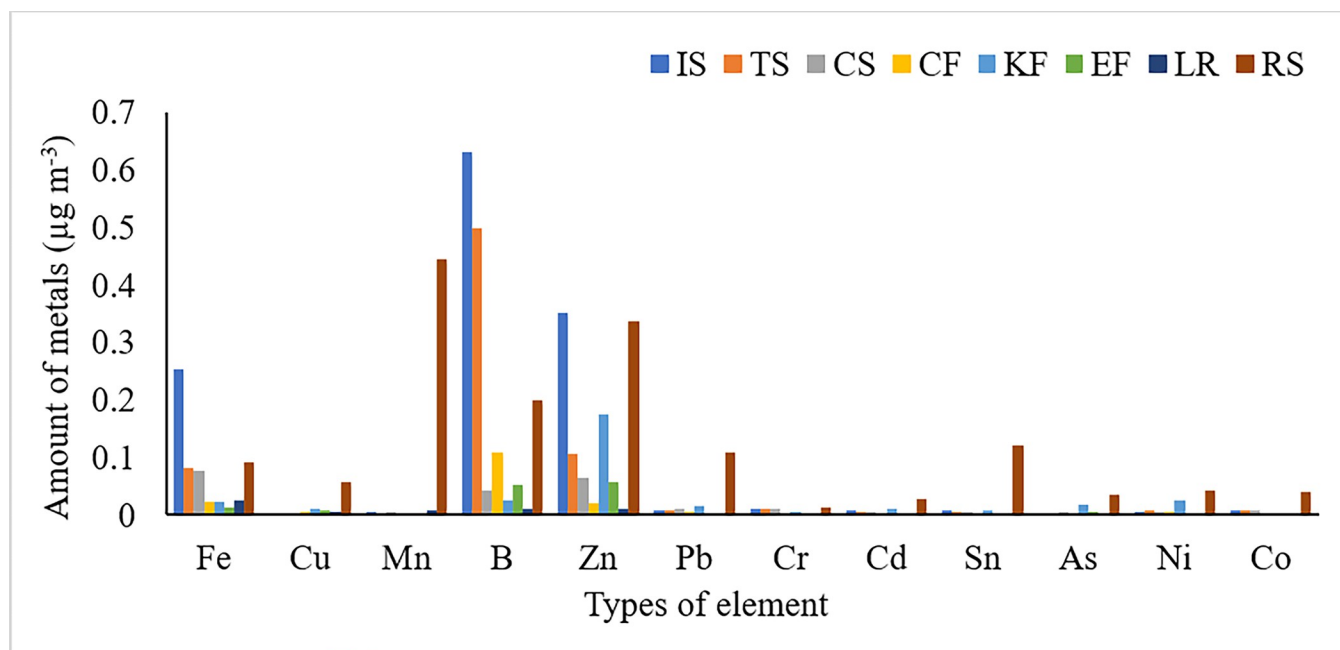

Fig 3. The level of trace elements at different microenvironments (CS, IS, TS, EF, CF, KF, LR and RS).

<https://doi.org/10.1371/journal.pone.0309995.g003>

Table 5. The exposure levels of trace elements in combined MEs (mean  $\pm$  SD  $\mu\text{g m}^{-3}$  per microenvironment).

| Element | A                  | B                 | C                 | D                 | E                 | F                 |
|---------|--------------------|-------------------|-------------------|-------------------|-------------------|-------------------|
| Fe      | 0.075 $\pm$ 0.010  | 0.073 $\pm$ 0.02  | 0.073 $\pm$ 0.016 | 0.055 $\pm$ 0.012 | 0.053 $\pm$ 0.015 | 0.053 $\pm$ 0.014 |
| Cu      | 0.0242 $\pm$ 0.01  | 0.0243 $\pm$ 0.01 | 0.0243 $\pm$ 0.01 | 0.024 $\pm$ 0.011 | 0.024 $\pm$ 0.086 | 0.024 $\pm$ 0.084 |
| Mn      | 0.179 $\pm$ 0.087  | 0.176 $\pm$ 0.070 | 0.172 $\pm$ 0.080 | 0.179 $\pm$ 0.090 | 0.175 $\pm$ 0.086 | 0.172 $\pm$ 0.084 |
| B       | 0.170 $\pm$ 0.039  | 0.160 $\pm$ 0.040 | 0.153 $\pm$ 0.040 | 0.155 $\pm$ 0.040 | 0.144 $\pm$ 0.04  | 0.137 $\pm$ 0.040 |
| Zn      | 0.180 $\pm$ 0.062  | 0.182 $\pm$ 0.070 | 0.197 $\pm$ 0.060 | 0.151 $\pm$ 0.061 | 0.154 $\pm$ 0.060 | 0.170 $\pm$ 0.058 |
| Pb      | 0.046 $\pm$ 0.021  | 0.044 $\pm$ 0.020 | 0.045 $\pm$ 0.020 | 0.046 $\pm$ 0.021 | 0.044 $\pm$ 0.021 | 0.045 $\pm$ 0.020 |
| Cr      | 0.007 $\pm$ 0.002  | 0.007 $\pm$ 0.002 | 0.008 $\pm$ 0.002 | 0.007 $\pm$ 0.002 | 0.007 $\pm$ 0.002 | 0.008 $\pm$ 0.002 |
| Cd      | 0.013 $\pm$ 0.005  | 0.012 $\pm$ 0.005 | 0.014 $\pm$ 0.005 | 0.013 $\pm$ 0.005 | 0.012 $\pm$ 0.005 | 0.014 $\pm$ 0.005 |
| Sn      | 0.050 $\pm$ 0.023  | 0.049 $\pm$ 0.023 | 0.049 $\pm$ 0.020 | 0.050 $\pm$ 0.024 | 0.049 $\pm$ 0.023 | 0.049 $\pm$ 0.023 |
| As      | 0.016 $\pm$ 0.007  | 0.016 $\pm$ 0.007 | 0.018 $\pm$ 0.007 | 0.016 $\pm$ 0.007 | 0.016 $\pm$ 0.007 | 0.017 $\pm$ 0.006 |
| Ni      | 0.019 $\pm$ 0.008  | 0.019 $\pm$ 0.008 | 0.023 $\pm$ 0.008 | 0.020 $\pm$ 0.008 | 0.019 $\pm$ 0.008 | 0.022 $\pm$ 0.008 |
| Co      | 0.018 $\pm$ 0.008  | 0.017 $\pm$ 0.007 | 0.017 $\pm$ 0.007 | 0.018 $\pm$ 0.008 | 0.017 $\pm$ 0.007 | 0.017 $\pm$ 0.007 |
|         | G                  | H                 | I                 | AA                | BB                | CC                |
| Fe      | 0.055 $\pm$ 0.016  | 0.052 $\pm$ 0.015 | 0.044 $\pm$ 0.015 | 0.052 $\pm$ 0.022 | 0.048 $\pm$ 0.021 | 0.051 $\pm$ 0.021 |
| Cu      | 0.024 $\pm$ 0.010  | 0.024 $\pm$ 0.012 | 0.033 $\pm$ 0.014 | 0.028 $\pm$ 0.014 | 0.027 $\pm$ 0.014 | 0.028 $\pm$ 0.014 |
| Mn      | 0.180 $\pm$ 0.088  | 0.176 $\pm$ 0.086 | 0.172 $\pm$ 0.084 | 0.203 $\pm$ 0.115 | 0.193 $\pm$ 0.110 | 0.200 $\pm$ 0.112 |
| B       | 0.102 $\pm$ 0.0400 | 0.092 $\pm$ 0.040 | 0.083 $\pm$ 0.040 | 0.110 $\pm$ 0.050 | 0.096 $\pm$ 0.040 | 0.094 $\pm$ 0.050 |
| Zn      | 0.147 $\pm$ 0.0640 | 0.149 $\pm$ 0.063 | 0.162 $\pm$ 0.061 | 0.158 $\pm$ 0.086 | 0.156 $\pm$ 0.082 | 0.182 $\pm$ 0.084 |
| Pb      | 0.046 $\pm$ 0.020  | 0.045 $\pm$ 0.020 | 0.052 $\pm$ 0.021 | 0.051 $\pm$ 0.028 | 0.048 $\pm$ 0.027 | 0.051 $\pm$ 0.027 |
| Cr      | 0.007 $\pm$ 0.020  | 0.007 $\pm$ 0.002 | 0.008 $\pm$ 0.002 | 0.007 $\pm$ 0.003 | 0.007 $\pm$ 0.003 | 0.008 $\pm$ 0.003 |
| Cd      | 0.013 $\pm$ 0.005  | 0.012 $\pm$ 0.005 | 0.014 $\pm$ 0.005 | 0.014 $\pm$ 0.006 | 0.013 $\pm$ 0.007 | 0.015 $\pm$ 0.006 |
| Sn      | 0.050 $\pm$ 0.024  | 0.049 $\pm$ 0.024 | 0.049 $\pm$ 0.023 | 0.056 $\pm$ 0.031 | 0.053 $\pm$ 0.030 | 0.055 $\pm$ 0.030 |
| As      | 0.016 $\pm$ 0.007  | 0.016 $\pm$ 0.007 | 0.018 $\pm$ 0.007 | 0.017 $\pm$ 0.009 | 0.017 $\pm$ 0.009 | 0.020 $\pm$ 0.009 |
| Ni      | 0.020 $\pm$ 0.008  | 0.019 $\pm$ 0.008 | 0.022 $\pm$ 0.008 | 0.021 $\pm$ 0.011 | 0.020 $\pm$ 0.010 | 0.024 $\pm$ 0.011 |
| Co      | 0.017 $\pm$ 0.008  | 0.017 $\pm$ 0.008 | 0.017 $\pm$ 0.007 | 0.019 $\pm$ 0.010 | 0.018 $\pm$ 0.010 | 0.018 $\pm$ 0.010 |

Note: SD is standard deviation.

<https://doi.org/10.1371/journal.pone.0309995.t005>

### Exposure level of trace elements in PM<sub>10</sub>

The exposure levels of the analyzed elements at the A, B, C, D, E, F, G, H, and I MEs ranged from 0.007 (Cr) to 0.179 (Zn), 0.007 (Cr) to 0.018 (Zn), 0.008 (Cr) to 0.197 (Zn), 0.007 (Cr) to 0.179 (Mn), 0.007 (Cr) to 0.175 (Mn), 0.008 (Cr) to 0.172 (Mn), 0.007 (Cr) to 0.180 (Mn), 0.007 (Cr) to 0.176 (Mn) and 0.008 (Cr) to 0.172 (Mn)  $\mu\text{g m}^{-3}$ , respectively. The results revealed that the level of Cr was the lowest in all MEs, whereas the levels of Zn in A, B, and C and of Mn in E, F, G, H, and I were the highest. In addition, the total exposure level, regardless of the type of metal, ranged from 0.657 (H) to 0.796 (A)  $\mu\text{g m}^{-3}$  in the order of H < I < G < E < F < D < B < C < A. On the other hand, the total exposure levels of the elements in the AA, BB and CC MEs were calculated, and their corresponding values ranged from 0.007 (Cr) to 0.203 (Mn), 0.007 (Cr) to 0.193 (Mn) and 0.007 (Cr) to 0.198 (Mn), respectively. The overall metal exposure levels, regardless of the presence of trace elements, were 0.734, 0.694 and 0.744  $\mu\text{g m}^{-3}$  for the AA, BB, and CC MEs, respectively. The exact values for the total exposure level of each element at each ME are summarized in Table 5.

### Health risk assessment of trace elements

Although baking *Injera* is not a daily routine for inhabitants, it has contributed to the intake of a large amounts of pollutants during the time of baking. As a result, the health risk of the adult

was estimated by considering two scenarios: (1) when an adult was baking *Injera* A, B, C, D, E, F, G, H, and I MEs) and (2) when the adult was not baking *Injera* (AA, BB and CC MEs). Thus, inhabitants' adverse carcinogenic and noncarcinogenic health risks are estimated using three exposure routes (ingestion, inhalation, and dermal contact) at each ME under two scenarios. The study results for scenarios 1 and 2 are shown in Tables 6 and 7, respectively.

### Risk assessment at the A, B, C, D, E, F, G, H, and I microenvironment

The cumulative and individual elemental risk of inhabitants in each ME were assessed based on the method established by the U.S. EPA (i.e., using HQ and HI) [44]. The cancer and non-cancer risks to inhabitants from exposure to trace elements were determined for each ME through ingestion, inhalation and dermal contact. The analysis was performed to determine the commutative and individual effects of trace elements using HQ, HI, and LCR values. The cumulative impact is calculated based on each route's total element intake through all exposure routes (sum of HI of each element) and the total element intake (sum of HI of all elements in a single route). The individual element risk is based on the intake of a single element through each exposure route (HQ<sub>inh</sub>, HQ<sub>ing</sub> and HQ<sub>der</sub>) and the intake of a single element through the three exposure routes (sum of HQ<sub>inh</sub>, HQ<sub>ing</sub> and HQ<sub>der</sub>). The obtained results indicated that the adult had a negligible noncarcinogenic risk because the individual element HQ values in both cases for all the elements in all the microenvironments were less than 1. However, the cumulative effect in both cases showed that the HI was greater than one, which indicates that the analyzed elements had a significant health impact on the exposed inhabitants due to their cumulative effect. Different exposure pathways have different contributions to the total exposure level. The dermal contact pathway has the lowest subsidy. Inhalation is the dominant route, followed by ingestion and dermal contact routes, for all MEs. Regarding the individual elements, Mn, Cd and As account for the majority of the commutative effect. The general trends of the HI values followed a decreasing order of I > H > F > C > E > B > G > D > A.

An adult's cancer risk due to carcinogenic elements was estimated as an individual and cumulative effect in a manner similar to that used for the noncancer risk assessment. LCR values for many individual elements at all MEs through inhalation and ingestion routes were within the tolerable range set by the U.S. EPA ( $1 \times 10^{-6}$  to  $1 \times 10^{-4}$ ). However, except for Cr in dermal contact, the LCR values of all the tested elements are below the limit value ( $1 \times 10^{-6}$ ). The ingestion route is the predominant exposure route, followed by inhalation and dermal contact. The cumulative LCR for all metals was within the tolerable range set by the USEPA. Thus, inhabitants have a low probability of developing cancer in their lifetime. Nevertheless, the LCR values for all the elements are tolerable and below the standard. Furthermore, Cr and Cd contribute more to the LCR. Hence, wearing masks might reduce the intake of PM<sub>10</sub>, minimizing its effect [28].

Similarly, the cancer and noncancer risk of inhabitants who spent time in the AA, BB and CC MEs were also estimated for the A, B, C, D, E, F, G, H and I MEs. The results revealed that both individual elements (a single element in each route and a single element in all routes) and the cumulative effect of trace elements (all elements in a single route and all elements in all routes) in the AA, BB and CC MEs were less than unity, which indicates that a adult in these MEs has limited potential health impacts from noncarcinogenic risk. Mn, Cr, and Cd contributed the most to the total exposure. In addition, although an adult is less likely to have a non-cancer risk, inhabitants who spent more time in CC MEs were more likely to have a noncancer risk than inhabitants who spent more on BB or AA MEs. This might be due to charcoal fuel, which contributes to high levels of pollutants. Inhalation is the predominant route of exposure, in contrast to dermal and ingestion. At the same time, many individual elements and their

Table 6. Health risk assessment (for both carcinogenic and noncarcinogenic risks) of heavy metal exposure for inhabitants at different MEs.

| A        |                     |        |                |         |                    |         | Total in 3 routes    |                     | B                   |         |                |         |                    |           |                      | Total in 3 routes   |  |
|----------|---------------------|--------|----------------|---------|--------------------|---------|----------------------|---------------------|---------------------|---------|----------------|---------|--------------------|-----------|----------------------|---------------------|--|
|          | Inhalation exposure |        | Dermal contact |         | Ingestion exposure |         | LCR                  | HI                  | Inhalation exposure |         | Dermal contact |         | Ingestion exposure |           | LCR*                 | HI**                |  |
| Elements | LCR                 | HQ     | LCR            | HQ      | LCR                | HQ      |                      |                     | LCR                 | HQ      | LCR            | HQ      | LCR                | HQ        |                      |                     |  |
| Fe       |                     |        |                |         |                    | 9.8E-05 |                      | 9.8E-05             |                     |         |                |         |                    | 9.8E-05   |                      | 9.8E-05             |  |
| Cu       |                     | 0.0001 |                | 3.1E-07 |                    | 0.0006  |                      | 0.0007              |                     | 0.0001  |                | 3.2E-07 |                    | 0.0006    |                      | 0.0007              |  |
| Mn       |                     | 0.6515 |                | 2.3E-06 |                    | 0.0012  |                      | 0.6527              |                     | 0.6625  |                | 2.3E-06 |                    | 0.0012    |                      | 0.664               |  |
| B        |                     |        |                |         |                    | 0.0008  |                      | 0.0008              |                     |         |                |         |                    | 0.0008    |                      | 0.0008              |  |
| Zn       |                     | 0.0001 |                | 2.3E-06 |                    | 0.0005  |                      | 0.0007              |                     | 0.0001  |                | 2.4E-06 |                    | 0.0006    |                      | 0.0007              |  |
| Pb       | 5.1E-07             | 0.0024 | 1.3E-07        | 5.7E-07 | 8.3E-06            | 0.0119  | 8.9E-06              | 0.0143              | 5.2E-07             | 0.0024  | 1.3E-07        | 5.9E-07 | 8.4E-06            | 0.012     | 9.0E-06              | 0.0144              |  |
| Cr       | 1.3E-05             | 0.0136 | 1.5E-06        | 9.6E-07 | 2.4E-06            | 0.0023  | 1.6E-05              | 0.0159              | 1.3E-05             | 0.0137  | 1.5E-06        | 9.7E-07 | 2.4E-06            | 0.0023    | 1.7E-05              | 0.016               |  |
| Cd       | 3.2E-06             | 0.2345 | 3.3E-07        | 6.6E-07 | 5.4E-06            | 0.0117  | 8.9E-06              | 0.2462              | 3.2E-06             | 0.2332  | 3.2E-07        | 6.6E-07 | 5.3E-06            | 0.0117    | 8.9E-06              | 0.245               |  |
| As       | 9.4E-06             | 0.1899 | 6.9E-07        | 6.0E-07 | 1.5E-05            | 0.0475  | 2.5E-05              | 0.2374              | 9.8E-06             | 0.1976  | 7.2E-07        | 6.3E-07 | 1.6E-05            | 0.0494    | 2.6E-05              | 0.2471              |  |
| Ni       | 6.5E-07             | 0.0708 | 4.0E-07        | 6.2E-06 | 1.1E-06            | 0.0004  | 2.1E-06              | 0.0711              | 6.6E-07             | 0.0713  | 4.1E-07        | 6.3E-06 | 1.1E-06            | 0.0004    | 2.1E-06              | 0.0717              |  |
| HI*      | 2.6E-05             | 1.1629 | 3.0E-06        | 1.4E-05 | 3.5E-05            | 0.0769  | 6.2E-05 <sup>a</sup> | 1.2398 <sup>b</sup> | 2.7E-05             | 1.1809  | 3.0E-06        | 1.4E-05 | 3.3E-05            | 0.0789    | 6.3E-05 <sup>a</sup> | 1.2598 <sup>b</sup> |  |
| C        |                     |        |                |         |                    |         |                      |                     | D                   |         |                |         |                    |           |                      |                     |  |
| Fe       |                     |        |                |         |                    | 9.8E-05 |                      | 9.8E-05             |                     |         |                |         |                    | 7.2E-05   | 0                    | 7.2E-05             |  |
| Cu       |                     | 0.0001 |                | 3.2E-07 |                    | 0.0006  |                      | 0.0005721           |                     | 0.0001  |                | 3.1E-07 |                    | 0.0006    | 0                    | 0.0007              |  |
| Mn       |                     | 0.6497 |                | 2.3E-06 |                    | 0.0012  |                      | 0.0011601           |                     | 0.6575  |                | 2.3E-06 |                    | 0.0012    | 0                    | 0.6587              |  |
| B        |                     |        |                |         |                    | 0.0007  |                      | 0.0007208           |                     |         |                |         |                    | 0.0007    | 0                    | 0.0008              |  |
| Zn       |                     | 0.0001 |                | 2.6E-06 |                    | 0.0006  |                      | 0.0006196           |                     | 9.2E-05 |                | 2.1E-06 |                    | 0.0005    | 0                    | 0.0006              |  |
| Pb       | 5.3E-07             | 0.0024 | 1.3E-07        | 6.0E-07 | 8.6E-06            | 0.0122  | 9.2E-06              | 0.0122529           | 5.2E-07             | 0.0024  | 1.2E-07        | 5.9E-07 | 8.4E-06            | 0.012     | 9.0E-06              | 0.0144              |  |
| Cr       | 1.3E-05             | 0.0145 | 1.6E-06        | 1.0E-06 | 2.6E-06            | 0.0024  | 1.8E-05              | 0.0024377           | 1.3E-05             | 0.0136  | 1.5E-06        | 9.6E-07 | 2.4E-06            | 0.0023    | 1.6E-05              | 0.0158              |  |
| Cd       | 3.7E-06             | 0.2657 | 3.7E-07        | 7.5E-07 | 6.1E-06            | 0.0133  | 1.0E-05              | 0.013295            | 3.2E-06             | 0.2294  | 3.2E-07        | 6.4E-07 | 5.2E-06            | 0.0115    | 8.7E-06              | 0.2408              |  |
| As       | 1.1E-05             | 0.2213 | 8.1E-07        | 7.0E-07 | 1.8E-05            | 0.0553  | 2.9E-05              | 0.0553473           | 9.4E-06             | 0.1898  | 6.9E-07        | 6.0E-07 | 1.5E-05            | 0.0474    | 2.5E-05              | 0.2372              |  |
| Ni       | 7.5E-07             | 0.0818 | 4.7E-07        | 7.2E-06 | 1.2E-06            | 0.0004  | 2.4E-06              | 0.0004116           | 6.7E-07             | 0.0726  | 4.1E-07        | 6.4E-06 | 1.1E-06            | 0.0004    | 2.2E-06              | 0.073               |  |
| HI*      | 2.9E-05             | 1.2366 | 3.3E-06        | 1.6E-05 | 3.6E-05            | 0.0868  | 6.9E-05 <sup>a</sup> | 0.0869 <sup>b</sup> | 2.6E-05             | 1.1654  | 3.0E-06        | 1.4E-05 | 3.2E-05            | 0.0765017 | 6.2E-05 <sup>a</sup> | 1.2419 <sup>b</sup> |  |
| E        |                     |        |                |         |                    |         | Total in 3 routes    |                     | F                   |         |                |         |                    |           |                      | Total in 3 routes   |  |
|          | Inhalation exposure |        | Dermal contact |         | Ingestion exposure |         | LCR                  | HI                  | Inhalation exposure |         | Dermal contact |         | Ingestion exposure |           | LCR*                 | HI**                |  |
| Elements | LCR                 | HQ     | LCR            | HQ      | LCR                | HQ      |                      |                     | LCR                 | HQ      | LCR            | HQ      | LCR                | HQ        |                      |                     |  |
| Fe       |                     |        |                |         |                    | 7.1E-05 |                      | 7.1E-05             |                     |         |                |         |                    | 7.2E-05   |                      | 7.2E-05             |  |
| Cu       |                     | 0.0001 |                | 3.2E-07 |                    | 0.0006  |                      | 0.0007              |                     | 0.0001  |                | 3.2E-07 |                    | 0.0006    |                      | 0.0007              |  |
| Mn       |                     | 0.6652 |                | 2.3E-06 |                    | 0.0012  |                      | 0.6663              |                     | 0.6533  |                | 2.3E-06 |                    | 0.0012    |                      | 0.6545              |  |

(Continued)

Table 6. (Continued)

|     |                |         |                |         |                |         |                      |                     |                |           |                |         |                |         |                      |                     |
|-----|----------------|---------|----------------|---------|----------------|---------|----------------------|---------------------|----------------|-----------|----------------|---------|----------------|---------|----------------------|---------------------|
| B   |                |         |                |         |                | 0.0007  |                      | 0.0007              |                |           |                |         |                | 0.0007  |                      | 0.0007              |
| Zn  |                | 9.7E-05 |                | 2.0E-06 |                | 0.0005  |                      | 0.0006              |                | 0.0001    |                | 2.2E-06 |                | 0.0005  |                      | 0.0006              |
| Pb  | 5.2E-07        | 0.0024  | 1.3E-07        | 5.9E-07 | 8.4E-06        | 0.0120  | 9.0E-06              | 0.0144              | 5.3E-07        | 0.0024    | 1.3E-07        | 6.1E-07 | 8.6E-06        | 0.0123  | 9.3E-06              | 0.0147              |
| Cr  | 1.2E-05        | 0.0136  | 1.5E-06        | 9.6E-07 | 2.4E-06        | 0.0023  | 1.6E-05              | 0.0159              | 1.3E-05        | 0.0144    | 1.6E-06        | 1.0E-06 | 2.6E-06        | 0.0024  | 1.8E-05              | 0.0168              |
| Cd  | 3.1E-06        | 0.2268  | 3.1E-07        | 6.4E-07 | 5.2E-06        | 0.0113  | 8.6E-06              | 0.2381              | 3.6E-06        | 0.260     | 3.6E-07        | 7.3E-07 | 5.9E-06        | 0.0130  | 9.9E-06              | 0.273               |
| As  | 9.8E-06        | 0.1966  | 7.1E-07        | 6.2E-07 | 1.6E-05        | 0.0491  | 2.6E-05              | 0.2457              | 1.1E-05        | 0.2206    | 8.1E-07        | 7.1E-07 | 1.8E-05        | 0.0552  | 3.0E-05              | 0.2759              |
| Ni  | 6.7E-07        | 0.0728  | 4.1E-07        | 6.4E-06 | 1.1E-06        | 0.0004  | 2.2E-06              | 0.0734              | 7.7E-07        | 0.0835    | 4.7E-07        | 7.3E-06 | 1.2E-06        | 0.0004  | 2.5E-06              | 0.0839              |
| HI* | <b>2.7E-05</b> | 1.1774  | <b>3.0E-06</b> | 1.4E-05 | <b>3.3E-05</b> | 0.0781  | 6.3E-05 <sup>a</sup> | 1.2556 <sup>b</sup> | <b>2.9E-05</b> | 1.2346    | <b>3.3E-06</b> | 1.5E-05 | <b>3.6E-05</b> | 0.0863  | 6.9E-05 <sup>a</sup> | 1.321 <sup>b</sup>  |
| G   |                |         |                |         |                |         |                      |                     | H              |           |                |         |                |         |                      |                     |
| Fe  |                |         |                |         |                | 7.1E-05 |                      | 7.1E-05             |                |           |                |         |                | 7.1E-05 |                      | 7.1E-05             |
| Cu  |                | 0.0001  |                | 3.1E-07 |                | 0.0006  |                      | 0.0007              |                | 0.0001    |                | 3.2E-07 |                | 0.0006  |                      | 0.0007              |
| Mn  |                | 0.6587  |                | 2.3E-06 |                | 0.001   |                      | 0.6599              |                | 0.6663    |                | 2.3E-06 |                | 0.001   |                      | 0.6675              |
| B   |                |         |                |         |                | 0.0005  |                      | 0.0005              |                |           |                |         |                | 0.0004  |                      | 0.0004              |
| Zn  |                | 8.9E-05 |                | 1.9E-06 |                | 0.0004  |                      | 0.0005              |                | 9.4E-05   |                | 2.0E-06 |                | 0.0005  |                      | 0.0006              |
| Pb  | 5.2E-07        | 0.0024  | 1.3E-07        | 5.9E-07 | 8.5E-06        | 0.0121  | 9.1E-06              | 0.0145              | 5.2E-07        | 0.0024    | 1.3E-07        | 6.0E-07 | 8.5E-06        | 0.0121  | 9.1E-06              | 0.0145              |
| Cr  | 1.3E-05        | 0.0136  | 1.5E-06        | 9.6E-07 | 2.4E-06        | 0.0023  | 1.6E-05              | 0.0158              | 1.2E-05        | 0.0136    | 1.5E-06        | 9.6E-07 | 2.4E-06        | 0.0023  | 1.6E-05              | 0.0159              |
| Cd  | 3.2E-06        | 0.2334  | 3.2E-07        | 6.6E-07 | 5.3E-06        | 0.0117  | 8.9E-06              | 0.2451              | 3.2E-06        | 0.2381    | 3.2E-07        | 6.5E-07 | 5.3E-06        | 0.0115  | 8.8E-06              | 0.2424              |
| As  | 9.7E-06        | 0.1958  | 7.2E-07        | 6.2E-07 | 1.6E-05        | 0.0490  | 2.6E-05              | 0.2448              | 1.0E-05        | 0.2027    | 7.4E-07        | 6.4E-07 | 1.6E-05        | 0.0507  | 2.7E-05              | 0.253               |
| Ni  | 6.6E-07        | 0.0717  | 4.0E-07        | 6.3E-06 | 1.1E-06        | 0.0004  | 2.1E-06              | 0.0720              | 6.6E-07        | 0.0718461 | 4.0E-07        | 6.3E-06 | 1.1E-06        | 0.0004  | 2.2E-06              | 0.0722              |
| HI* | <b>2.7E-05</b> | 1.1757  | <b>3.0E-06</b> | 1.3E-05 | <b>3.3E-05</b> | 0.0780  | 6.3E-05 <sup>a</sup> | 1.2538 <sup>b</sup> | <b>2.7E-05</b> | 1.1878706 | <b>3.1E-06</b> | 1.3E-05 | <b>3.4E-05</b> | 0.0797  | 6.4E-05 <sup>a</sup> | 1.2675 <sup>b</sup> |

| I        |                     |          |                |          |                    |          | Total in 3 routes    |                    |
|----------|---------------------|----------|----------------|----------|--------------------|----------|----------------------|--------------------|
| Elements | Inhalation exposure |          | Dermal contact |          | Ingestion exposure |          | LCR*                 | HI**               |
|          | LCR                 | HQ       | LCR            | HQ       | LCR                | HQ       |                      |                    |
| Fe       |                     |          |                |          |                    | 5.97E-05 |                      | 5.973E-05          |
| Cu       |                     | 0.000156 |                | 4.39E-07 |                    | 0.000779 |                      | 0.0009356          |
| Mn       |                     | 0.65154  |                | 2.29E-06 |                    | 0.001163 |                      | 0.6527054          |
| B        |                     |          |                |          |                    | 0.000391 |                      | 0.000391           |
| Zn       |                     | 0.000102 |                | 2.17E-06 |                    | 0.000513 |                      | 0.0006175          |
| Pb       | 6.0E-07             | 0.002775 | 1.5E-07        | 6.88E-07 | 9.8E-06            | 0.013953 | 1.05E-05             | 0.016728           |
| Cr       | 1.4E-05             | 0.0146   | 1.6E-06        | 1.0E-06  | 2.6E-06            | 0.002433 | 1.8E-05              | 0.0170303          |
| Cd       | 3.7E-06             | 0.2699   | 3.7E-07        | 7.6E-07  | 6.2E-06            | 0.013496 | 1.0E-05              | 0.2834123          |
| As       | 1.1E-05             | 0.2282   | 8.3E-07        | 7.2E-07  | 1.8E-05            | 0.057039 | 3.0E-05              | 0.2851934          |
| Ni       | 7.6E-07             | 0.0821   | 4.7E-07        | 7.2E-06  | 1.2E-06            | 0.00041  | 2.5E-06              | 0.0824858          |
| HI*      | <b>3.0E-05</b>      | 1.2493   | <b>3.4E-06</b> | 1.5E-05  | <b>3.8E-05</b>     | 0.090237 | 7.1E-05 <sup>a</sup> | 1.340 <sup>b</sup> |

Note: HI\* is the sum of all hazard quotients of all elements in each exposure route; HI\*\* is the sum of all hazard quotients of each element in all exposure routes; LCR\* is the sum of the lifetime cancer risk values of each element in all exposure routes; the values in bold and italics indicate the sum of all LCR values of all cancer risk elements in each exposure route; <sup>a</sup> is the total LCR of all elements by all routes; and <sup>b</sup> is the sum of all trace elements in all routes.

<https://doi.org/10.1371/journal.pone.0309995.t006>



Table 7. 1Health risk assessment (both carcinogenic and non-carcinogenic risks) from heavy metal exposure of woman via inhalation, ingestion, and dermal exposure pathways at 'AA', 'BB' and 'CC' MEs.

| Elements | 'AA' ME          |         |                |         |                 |         | Total in 3 routes    |                       | 'BB' ME          |         |                      |         |                 |         | Total in 3 routes    |                     |
|----------|------------------|---------|----------------|---------|-----------------|---------|----------------------|-----------------------|------------------|---------|----------------------|---------|-----------------|---------|----------------------|---------------------|
|          | Inhalation route |         | Dermal route   |         | Ingestion route |         | LCR*                 | HI**                  | Inhalation route |         | Dermal contact route |         | Ingestion route |         | LCR*                 | HI**                |
|          | LCR              | HQ      | LCR            | HQ      | LCR             | HQ      |                      |                       | LCR              | HQ      | LCR                  | HQ      | LCR             | HQ      |                      |                     |
| Fe       |                  |         |                |         |                 | 4.5E-05 |                      | 4.5E-05               |                  |         |                      |         |                 | 4.4E-05 |                      | 4.4E-05             |
| Cu       |                  | 8.4E-05 |                | 2.4E-07 |                 | 0.0004  |                      | 0.0005                |                  | 8.6E-05 |                      | 2.4E-07 |                 | 0.0004  |                      | 0.0005              |
| Mn       |                  | 0.4935  |                | 1.7E-06 |                 | 0.0009  |                      | 0.4944                |                  | 0.4943  |                      | 1.7E-06 |                 | 0.0009  |                      | 0.4952              |
| B        |                  |         |                |         |                 | 0.0003  |                      | 0.0003                |                  |         |                      |         |                 | 0.0003  |                      | 0.0003              |
| Zn       |                  | 6.4E-05 |                | 1.4E-06 |                 | 0.0003  |                      | 0.0004                |                  | 6.7E-05 |                      | 1.4E-06 |                 | 0.0003  |                      | 0.0004              |
| Pb       | 3.8E-07          | 0.0018  | 9.4E-08        | 4.4E-07 | 6.2E-06         | 0.0088  | 6.7E-06              | 0.0106                | 3.8E-07          | 0.002   | 9.3E-08              | 4.3E-07 | 6.1E-06         | 0.0088  | 6.6E-06              | 0.0105              |
| Cr       | 7.9E-06          | 0.0086  | 9.3E-07        | 6.1E-07 | 1.5E-06         | 0.0014  | 1.0E-05              | 0.010                 | 7.9E-06          | 0.0085  | 9.2E-07              | 6.0E-07 | 1.5E-06         | 0.0014  | 1.0E-05              | 0.0099              |
| Cd       | 2.3E-06          | 0.1641  | 2.3E-07        | 4.6E-07 | 3.8E-06         | 0.0082  | 6.3E-06              | 0.1723                | 2.2E-06          | 0.1605  | 2.2E-07              | 4.5E-07 | 3.7E-06         | 0.0080  | 6.1E-06              | 0.1685              |
| As       | 7.0E-06          | 0.1411  | 5.2E-07        | 4.5E-07 | 1.1E-05         | 0.0353  | 1.9E-05              | 0.1763                | 7.2E-06          | 0.1447  | 5.3E-07              | 4.6E-07 | 1.2E-05         | 0.0362  | 1.9E-05              | 0.1809              |
| Ni       | 4.8E-07          | 0.0517  | 2.9E-07        | 4.5E-06 | 7.8E-07         | 0.0003  | 1.5E-06              | 0.0519                | 4.7E-07          | 0.0513  | 2.9E-07              | 4.5E-06 | 7.7E-07         | 0.0003  | 1.5E-06              | 0.0515              |
| HI*      | <b>1.8E-05</b>   | 0.861   | <b>2.1E-06</b> | 9.8E-06 | <b>2.4E-05</b>  | 0.0560  | 4.4E-05 <sup>a</sup> | <sup>b</sup>          | <b>1.8E-05</b>   | 0.8612  | <b>2.1E-06</b>       | 9.8E-06 | <b>2.4E-05</b>  | 0.0566  | 4.4E-05 <sup>a</sup> | 0.9179 <sup>b</sup> |
| 'CC' ME  |                  |         |                |         |                 |         |                      |                       |                  |         |                      |         |                 |         |                      |                     |
| Fe       |                  |         |                |         |                 | 4.5E-05 |                      | 4.5E-05               |                  |         |                      |         |                 |         |                      |                     |
| Cu       |                  | 8.7E-05 |                | 2.5E-07 |                 | 0.0004  |                      | 0.0005                |                  |         |                      |         |                 |         |                      |                     |
| Mn       |                  | 0.4934  |                | 1.7E-06 |                 | 0.0009  |                      | 0.494                 |                  |         |                      |         |                 |         |                      |                     |
| B        |                  |         |                |         |                 | 0.0003  |                      | 0.0003                |                  |         |                      |         |                 |         |                      |                     |
| Zn       |                  | 7.5E-05 |                | 1.6E-06 |                 | 0.0004  |                      | 0.0005                |                  |         |                      |         |                 |         |                      |                     |
| Pb       | 3.9E-07          | 0.0018  | 9.7E-08        | 4.5E-07 | 6.4E-06         | 0.0091  | 6.8E-06              | 0.0109                |                  |         |                      |         |                 |         |                      |                     |
| Cr       | 8.6E-06          | 0.0093  | 1.0E-06        | 6.6E-07 | 1.7E-06         | 0.0016  | 1.1E-05              | 0.0109                |                  |         |                      |         |                 |         |                      |                     |
| Cd       | 2.6E-06          | 0.1884  | 2.6E-07        | 5.3E-07 | 4.3E-06         | 0.0094  | 7.2E-06              | 0.1978                |                  |         |                      |         |                 |         |                      |                     |
| As       | 8.2E-06          | 0.1654  | 6.0E-07        | 5.2E-07 | 1.3E-05         | 0.0413  | 2.2E-05              | 0.2067                |                  |         |                      |         |                 |         |                      |                     |
| Ni       | 5.6E-07          | 0.0603  | 3.4E-07        | 5.3E-06 | 9.0E-07         | 0.0003  | 1.8E-06              | 0.061                 |                  |         |                      |         |                 |         |                      |                     |
| HI*      | <b>2.0E-05</b>   | 0.9186  | <b>2.3E-06</b> | 1.1E-05 | <b>2.7E-05</b>  | 0.0638  | 4.9E-05 <sup>a</sup> | 0.982424 <sup>b</sup> |                  |         |                      |         |                 |         |                      |                     |

Note: HI\* designates the sum of all hazard quotient of all elements in each exposure routes, HI\*\* designates the sum of all hazard quotient of each element in all exposure routes, LCR\* designates the sum of lifetime cancer risk value of each element in in all exposure routes, the values which bold and italic indicates the sum of all LCR values of all cancer risk elements in each exposure routes

<sup>a</sup> indicates total LCR of all elements by all routes and

<sup>b</sup> indicates the sum of all trace elements in all routes.

<https://doi.org/10.1371/journal.pone.0309995.t007>

cumulative values of LCR in all routes, except dermal contact, were found to be in the tolerable range ( $1 \times 10^{-6}$  to  $1 \times 10^{-4}$ ) [28]. Cr and As are the two dominant elements for the total exposure routes.

## Conclusion

The total exposure levels of PM<sub>2.5</sub> and PM<sub>10</sub> and the elemental composition of PM<sub>10</sub> at different combined MEs A, B, C, D, E, F, G, H, and I, AA, BB and CC were assessed. The highest exposure levels were observed in I ME (cooking *Wot* using charcoal fuel, baking *Injera* using traditional stove, seating in living room for family discussion, and commuting to work in road-side), that the time spent in this ME should be minimized to reduce the health impacts. The HQs of PM<sub>2.5</sub> for G, H, and I MEs, and PM<sub>10</sub> for G, H, I, AA, BB and CC MEs are > 1, indicating that inhabitants at these MEs might have significant non-cancer health problems. The HI values of PM<sub>2.5</sub> and PM<sub>10</sub> for all MEs except 'A' and B, were >1, revealed that inhabitants at all the MEs, except at the A and B MEs, could have significant health problems due to the synergistic effect of the pollutants. Similarly, the individual metal non-cancer risk assessment showed no significant impact (HQ <1), while the cumulative impact of trace elements showed a significant impact (HI >1) in all MEs. The lifetime cancer risk assessment for carcinogenic elements in all MEs were found within the tolerable range set by U.S. EPA threshold values, which means 1 adult from a million inhabitants can be at risk of developing cancer in her lifetime. Moreover, among the activities, baking *Injera* using traditional stove is the highest pollutant contributor that an immediate alternative solution should be implemented.

Overall, awareness of the public and stakeholders on the health impacts of PM<sub>2.5</sub> and PM<sub>10</sub> and elements in PM<sub>10</sub> at these MEs is highly recommended. The study also suggested that stakeholders look for alternative solutions to reduce air pollution, including promoting the use of clean fuels through minimizing costs, improving of the efficiency of existed stoves, promoting public bus transportation, and reducing taxation of electric cars. Inhabitants also recommended using more efficient and clean stoves, as well as well-ventilated kitchens. Moreover, minimizing the frequency and time spent at MEs with high levels of pollutants (such as G, H, I, AA, BB and CC) is another mechanism for mitigating health problems. Additional studies on the assessment of the toxic organic pollutants in the both indoor and outdoor air and the chemical composition of plant biomass, which is most commonly used as fuel for most Ethiopia, is highly recommended.

## Supporting information

**S1 Table. The calibration curve equation for the eleven elements in PM<sub>10</sub>.**  
(DOCX)

## Acknowledgments

The authors would like to express their sincere acknowledgement to all the participants.

## Author Contributions

**Conceptualization:** Asamene Embiale Taye, Bhagwan Singh Chandravanshi, Feleke Zewge Beshah, Endalkachew Sahle-Demessie.

**Formal analysis:** Asamene Embiale Taye.

**Supervision:** Bhagwan Singh Chandravanshi, Feleke Zewge Beshah.

**Writing – original draft:** Asamene Embiale Taye.

**Writing – review & editing:** Asamene Embiale Taye, Bhagwan Singh Chandravanshi, Feleke Zewge Beshah, Endalkachew Sahle-Demessie.

## References

1. Bodor K, Bodor Z, Szep R. Spatial distribution of trace elements (As, Cd, Ni, Pb) from PM(10) aerosols and human health impact assessment in an Eastern European country, Romania. *Environmental Monitoring and Assessment*. 2021; 193(4):176. Epub 2021/03/23. <https://doi.org/10.1007/s10661-021-08931-4> PMID: 33751243
2. Faour A, Abboud M, Germanos G, Farah W. Assessment of the exposure to PM(2.5) in different Lebanese microenvironments at different temporal scales. *Environmental Monitoring and Assessment*. 2022; 195(1):21. Epub 2022/10/25. <https://doi.org/10.1007/s10661-022-10607-6> PMID: 36279025
3. Collado JT, Abalos JG, de los Reyes I, Cruz MT, Leung GF, Abenojar K, et al. Spatiotemporal assessment of PM<sub>2.5</sub> exposure of a high-risk occupational group in a Southeast Asian Megacity. *Aerosol and Air Quality Research*. 2023; 23(1). <https://doi.org/10.4209/aaqr.220134>
4. Carlsten C, Salvi S, Wong GWK, Chung KF. Personal strategies to minimise effects of air pollution on respiratory health: advice for providers, patients and the public. *European Respiration Journal*. 2020; 55(6). <https://doi.org/10.1183/13993003.02056-2019> PMID: 32241830
5. Apte JS, Brauer M, Cohen AJ, Ezzati M, Pope CA. Ambient PM<sub>2.5</sub> Reduces Global and Regional Life Expectancy. *Environmental Science & Technology Letters*. 2018; 5(9):546–51. <https://doi.org/10.1021/acs.estlett.8b00360>
6. Caplin A, Ghandehari M, Lim C, Glimcher P, Thurston G. Advancing environmental exposure assessment science to benefit society. *Nature communications*. 2019; 10(1):1236. Epub 2019/03/16. <https://doi.org/10.1038/s41467-019-09155-4> PMID: 30874557
7. Morakinyo OM, Adebawale AS, Mokgobu MI, Mukhola S. Health risk of inhalation exposure to sub-10 µm particulate matter and gaseous pollutants in an urban-industrial area in South Africa: an ecological study. *An Ecological Study BMJ Open* 2017; 7:1–9. <https://doi.org/10.1136/bmjopen-2016013941>
8. Kalisa E, Archer S, Nagato E, Bizuru E, Lee K, Tang N, et al. Chemical and Biological Components of Urban Aerosols in Africa: Current Status and Knowledge Gaps. *International Journal of Environmental Research and Public Health*. 2019; 16(6). <https://doi.org/10.3390/ijerph16060941> PMID: 30875989
9. Lamri Naidja L, Ali-Khodja H, Khaldi S. Particulate matter from road traffic in Africa. *Journal of Earth Sciences and Geotechnical Engineering*. 2017; 7(1):289–304. Id: hal-01453344
10. Tefera W, Asfaw A, Gilliland F, Worku A, Wondimagegn M, Kumie A, et al. Indoor and outdoor air pollution-related health problem in Ethiopia: Review of related literature *Ethiopian Journal of Health and Development*. 2016; 30:5–16.
11. Algarni S, Khan RA, Khan NA, Mubarak NM. Particulate matter concentration and health risk assessment for a residential building during COVID-19 pandemic in Abha, Saudi Arabia. *Environmental Science and Pollution Research International*. 2021; 28(46):65822–31. Epub 2021/07/30. <https://doi.org/10.1007/s11356-021-15534-6> PMID: 34322813
12. WHO. Exposure to air pollution: A major public health concern Geneva, Switzerland 2010. Available from: [https://www.google.com.et/url?sa=t&rct=j&q=&esrc=s&source=web&cd=1&cad=rja&uact=8&ved=0ahUKEwj9fWS-ebSAhUrl8AKHChTBkYQFggYMAA&url=http%3A%2F%2Fwww.who.int%2Fipcs%2Ffeatures%2Fair\\_pollution.pdf&usq=AFQjCNEkvxRGOUUI9yFdlE8RjlHwpXO9zA&sig2=m00JCA8f0Ruw\\_oZOXZJ-eg&bvm=bv.150120842,d.bGs](https://www.google.com.et/url?sa=t&rct=j&q=&esrc=s&source=web&cd=1&cad=rja&uact=8&ved=0ahUKEwj9fWS-ebSAhUrl8AKHChTBkYQFggYMAA&url=http%3A%2F%2Fwww.who.int%2Fipcs%2Ffeatures%2Fair_pollution.pdf&usq=AFQjCNEkvxRGOUUI9yFdlE8RjlHwpXO9zA&sig2=m00JCA8f0Ruw_oZOXZJ-eg&bvm=bv.150120842,d.bGs).
13. Branco PT, Alvim-Ferraz MC, Martins FG, Sousa SI. The microenvironmental modelling approach to assess children's exposure to air pollution—A review. *Environmental Research*. 2014; 135:317–32. Epub 2014/12/03. <https://doi.org/10.1016/j.envres.2014.10.002> PMID: 25462682
14. Ogundele LT, Owoade OK, Hopke PK, Olise FS. Heavy metals in industrially emitted particulate matter in Ile-Ife, Nigeria. *Environmental Research*. 2017; 156:320–5. Epub <https://doi.org/10.1016/j.envres.2017.03.051> PMID: 28390299.
15. Sobhanardakani S. Human health risk assessment of potentially toxic heavy metals in the atmospheric dust of city of Hamedan, west of Iran. *Environmental Science and Pollution Research International*. 2018; 25(28):28086–93. Epub <https://doi.org/10.1007/s11356-018-2818-0> PMID: 30069775.
16. Sabet Aghlidi P, Cheraghi M, Lorestani B, Sobhanardakani S, Merrikhpour H. Analysis, spatial distribution and ecological risk assessment of arsenic and some heavy metals of agricultural soils, case study: South of Iran. *Journal of Environmental Health Science and Engineering*. 2020; 18(2):665–76. Epub <https://doi.org/10.1007/s40201-020-00492-x> PMID: 33312592.

17. Shammi SA, Salam A, Khan MAH. Assessment of heavy metal pollution in the agricultural soils, plants, and in the atmospheric particulate matter of a suburban industrial region in Dhaka, Bangladesh. *Environmental Monitoring and Assessment*. 2021; 193(2):104. Epub 2021/02/02. <https://doi.org/10.1007/s10661-021-08848-y> PMID: 33521861
18. Chowdhury S, Pillarisetti A, Oberholzer A, Jetter J, Mitchell J, Cappuccilli E, et al. A global review of the state of the evidence of household air pollution's contribution to ambient fine particulate matter and their related health impacts. *Environmental International*. 2023; 173:107835. Epub <https://doi.org/10.1016/j.envint.2023.107835> PMID: 36857905.
19. Kalisa E, Kuire V, Adams M. Children's exposure to indoor and outdoor black carbon and particulate matter air pollution at school in Rwanda, Central-East Africa. *Environmental Advances*. 2023; 11. <https://doi.org/10.1016/j.envadv.2022.100334>
20. Zhou Z, Shuai X, Lin Z, Yu X, Ba X, Holmes MA, et al. Association between particulate matter (PM<sub>2.5</sub>) air pollution and clinical antibiotic resistance: a global analysis. *Lancet Planet Health*. 2023; 7(8):e649–e59. [https://doi.org/10.1016/S2542-5196\(23\)00135-3](https://doi.org/10.1016/S2542-5196(23)00135-3) PMID: 37558346
21. Embiale A, Chandravanshi BS, Zewge F, Sahle-Demessie E. Health risk assessment of total volatile organic compounds, particulate matters and trace elements in PM10 in typical living rooms in Addis Ababa, Ethiopia. *International Journal of Environmental Analytical Chemistry*. 2020:1–19. <https://doi.org/10.1080/03067319.2020.1814266>
22. Endale T, Negussie M, Chandravanshi BS, Feleke Z. Determination of the Levels of Lead in The Road-side Soils of Addis Ababa, Ethiopia SINET: Ethiopian Journal of Science. 2012; 35(2):81–94.
23. Kume A, Charles K, Berehane Y, Anders E, Ali A. Magnitude and variation of traffic air pollution as measured by CO in the City of Addis Ababa, Ethiopia. *Ethiopian Journal of Health Development*. 2010; 24(3):156–66.
24. Do DH, Van Langenhove H, Walgraeve C, Hayleeyesus SF, De Wispelaere P, Dewulf J, et al. Volatile organic compounds in an urban environment: a comparison among Belgium, Vietnam and Ethiopia. *International Journal of Environmental Analytical Chemistry*. 2013; 93(3):298–314. <https://doi.org/10.1080/03067319.2011.620708>
25. Embiale A, Zewge F, Chandravanshi BS, Sahle-Demessie E. Levels of trace elements in PM10 collected at roadsides of Addis Ababa, Ethiopia, and exposure risk assessment. *Environmental Monitoring and Assessment*. 2019; 191(6):397. Epub 2019/05/28. <https://doi.org/10.1007/s10661-019-7503-3> PMID: 31127376
26. Dias D, Tchepel O. Spatial and Temporal Dynamics in Air Pollution Exposure Assessment. *International Journal of Environmental Research and Public Health*. 2018; 15(3). Epub 2018/03/21. <https://doi.org/10.3390/ijerph15030558> PMID: 29558426
27. Embiale A, Chandravanshi BS, Zewge F, Sahle-Demessie E. Investigation into Trace Elements in PM10 from the Baking of Injera Using Clean, Improved and Traditional Stoves: Emission and Health Risk Assessment. *Aerosol Science and Engineering*. 2019; 3(4):150–63. <https://doi.org/10.1007/s41810-019-00049-y>
28. Supplemental guidance for developing soil screening levels for superfund sites, vol 9355 [Internet]. 2001. Available from: <https://nepis.epa.gov/Exe/ZyPDF.cgi/910031JK.PDF?Dockey=910031JK.PDF>.
29. USEPA. Risk assessment guidance for superfund. Human health evaluation manual vol I. Office of Solid Waste and Emergency Response (EPA/540/1-89/002). 1989. Available from [https://www.epa.gov/sites/production/files/2015-09/documents/rags\\_a.pdf](https://www.epa.gov/sites/production/files/2015-09/documents/rags_a.pdf).
30. USEPA. Risk assessment guidance for superfund. Human health evaluation manual vol I. 1989. Available from: [https://www.epa.gov/sites/default/files/2015-09/documents/rags\\_a.pdf](https://www.epa.gov/sites/default/files/2015-09/documents/rags_a.pdf).
31. Embiale A, Chandravanshi BS, Zewge F, Sahle-Demessie E. Indoor air pollution from cook-stoves during Injera baking in Ethiopia, exposure, and health risk assessment. *Archives Environmental Occupational Health*. 2021; 76(2):103–15. Epub 2020/07/03. <https://doi.org/10.1080/19338244.2020.1787317> PMID: 32613906
32. Bodor K, Bodor Z, Szep A, Szep R. Human health impact assessment and temporal distribution of trace elements in Copsa Mica- Romania. *Science Report*. 2021; 11(1):7049. Epub 2021/03/31. <https://doi.org/10.1038/s41598-021-86488-5> PMID: 33782481
33. Mbazima SJ. Health risk assessment of particulate matter 2.5 in an academic metallurgy workshop. *Indoor Air*. 2022; 32(9):e13111. Epub 2022/09/29. <https://doi.org/10.1111/ina.13111> PMID: 36168227
34. Liu T, Zhao C, Chen Q, Li L, Si G, Li L, et al. Characteristics and health risk assessment of heavy metal pollution in atmospheric particulate matter in different regions of the Yellow River Delta in China. *Environmental Geochemistry and Health*. 2022. Epub 2022/06/29. <https://doi.org/10.1007/s10653-022-01318-5> PMID: 35764757
35. Liu K, Shang Q, Wan C. Sources and Health Risks of Heavy Metals in PM<sub>2.5</sub> in a Campus in a Typical Suburb Area of Taiyuan, North China. *Atmosphere*. 2018; 9(2). <https://doi.org/10.3390/atmos9020046>

36. Kushwaha R, Lal H, Srivastava A, Jain VK. Human exposure to particulate matter and their risk assessment over Delhi, India. *National Academy Science Letters*. 2012; 35(6):497–504. <https://doi.org/10.1007/s40009-012-0085-z>
37. Benson NU, Anake WU, Adedapo AE, Fred-Ahmadu OH, Ayejuyo OO. Toxic metals in cigarettes and human health risk assessment associated with inhalation exposure. *Environmental Monitoring and Assessment*. 2017; 189(12):619. <https://doi.org/10.1007/s10661-017-6348-x> PMID: 29119337
38. Zhang J, Wei E, Wu L, Fang X, Li F, Yang Z, et al. Elemental Composition and Health Risk Assessment of PM<sub>10</sub> and PM<sub>2.5</sub> in the Roadside Microenvironment in Tianjin, China. *Aerosol and Air Quality Research*. 2018; 18(7):1817–27. <https://doi.org/10.4209/aaqr.2017.10.0383>
39. Just B, Rogak S, Kandlikar M. Characterization of ultrafine particulate matter from traditional and improved biomass cookstoves. *Environmental Science and Technology*. 2013; 47(7):3506–12. Epub <https://doi.org/10.1021/es304351p> PMID: 23469776.
40. Liu W, Shen G, Chen Y, Shen H, Huang Y, Li T, et al. Air pollution and inhalation exposure to particulate matter of different sizes in rural households using improved stoves in central China. *Journal of Environmental Science*. 2018; 63:87–95. Epub <https://doi.org/10.1016/j.jes.2017.06.019> PMID: 29406120.
41. Ezzati M, Mbinda BM, Kammen DM. Comparison of Emissions and Residential Exposure from Traditional and Improved Cookstoves in Kenya. *Environmental Science and Technology*. 2000; 34(4):578–83.
42. Hansch R, Mendel RR. Physiological functions of mineral micronutrients (Cu, Zn, Mn, Fe, Ni, Mo, B, Cl). *Current Opinion in Plant Biology*. 2009; 12(3):259–66. Epub <https://doi.org/10.1016/j.pbi.2009.05.006> PMID: 19524482.
43. Nandal V, Solanki M. Zn as a Vital Micronutrient in Plants. *Journal of Microbiology, Biotechnology and Food Sciences*. 2021; 11(3). <https://doi.org/10.15414/jmbfs.4026>
44. USEPA. Risk assessment guidance for superfund volume I: Human health evaluation manual (Part A). Washington, D.C. 20450 Office of Emergency and Remedial Response U.S. Environmental Protection Agency 1989. Available from [https://www.epa.gov/sites/production/files/2015-09/documents/rags\\_a.pdf](https://www.epa.gov/sites/production/files/2015-09/documents/rags_a.pdf).
